# Supplementary material for: A new ‘turn-on’ and reversible fluorescent sensor for Al3+ detection and live cell imaging
Source: Royal Society of Chemistry journal article supplement (doi:10.1039/c9ay01438a), 2019-01-01
Supplement: c9ay01438a1.pdf [file c9ay01438a1.pdf]

## A New 'Turn-on' and reversible fluorescent sensor for Al<sup>3+</sup> detection and live cell imaging

Jian Hua Wang<sup>a</sup>, LiHen Feng<sup>a</sup>, JianBin Chao<sup>b</sup>, Yu Wang<sup>a\*</sup>, ShaoMin Shuang<sup>a\*</sup>

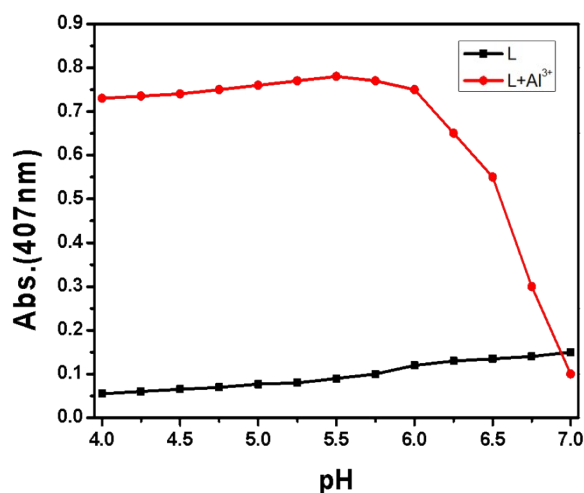

Fig.S1. Effect of pH on the absorbance of L (20  $\mu$ M) and L-Al<sup>3+</sup> complex at 407 nm in MeOH/water (v/v, 1:1).

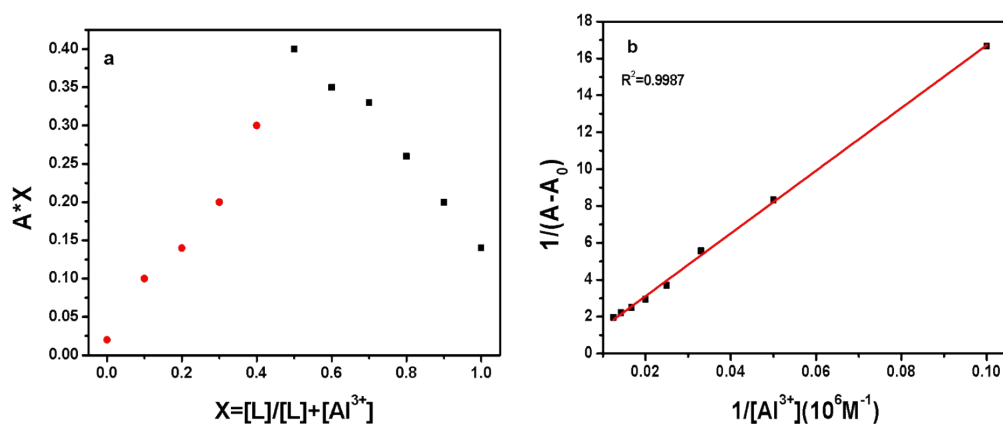

Fig.S2. (a) Job's plot for L and Al<sup>3+</sup> complexation in MeOH/water(v/v, 1:1, pH 6.0). The total concentration of L and Al<sup>3+</sup> is 100  $\mu$ M. (b) Benesi-Hildebrand plot from absorption titration data of L with Al<sup>3+</sup>. A: absorbance at 407 nm.

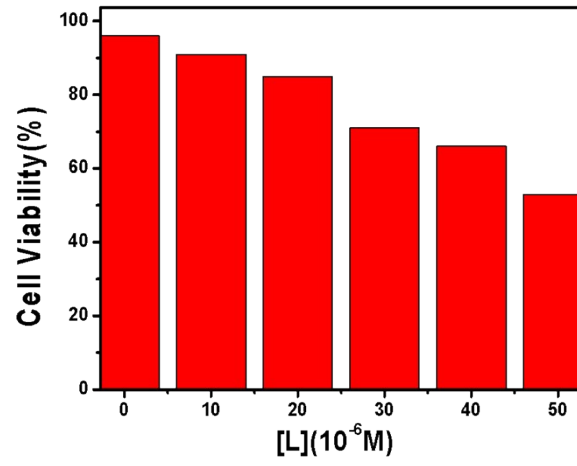

**Fig.S3.** Cytotoxicity profile (% cell viability) estimated by the MTT assay after 24 h incubation at 37 °C
